# Supplementary material for: Advances in the synthesis and structure of α-canaphite: a multitool and multiscale study
Source: Royal Society of Chemistry journal article supplement (doi:10.1039/d0ce00132e), 2020-01-01
Supplement: d0ce00132e1.pdf [file d0ce00132e1.pdf]

## Supporting information

### Advances in the synthesis and structure of $\alpha$ -canaphite: a multitool and multiscale study

Laëtitia Mayen<sup>a</sup>, Nicholai D. Jensen<sup>b,c</sup>, Maximilien Desbord<sup>a</sup>, Danielle Laurencin<sup>b</sup>, Christel Gervais<sup>c</sup>, Christian Bonhomme<sup>c</sup>, Mark E. Smith<sup>d,e,f</sup>, Florence Porcher<sup>g</sup>, Erik Elkaim<sup>h</sup>, Cédric Charvillat<sup>a</sup>, Pierre Gras<sup>a</sup>, Christian Rey<sup>a</sup>, Jérémy Soulié<sup>a</sup>, Christèle Combes<sup>a,\*</sup>

<sup>a</sup>CIRIMAT, Université de Toulouse, CNRS, Toulouse INP - ENSIACET, Toulouse, France

<sup>b</sup>ICGM, Univ. Montpellier, CNRS, ENSCM, Montpellier, France

<sup>c</sup>Sorbonne Université, CNRS, Laboratoire de Chimie de la Matière Condensée de Paris, UMR 7574, Paris, France

<sup>d</sup>Vice-Chancellor's Office, Highfield Campus, University of Southampton, University Road, Southampton, SO17 1BJ, University of Southampton, UK, and Department of Chemistry, Lancaster University, Bailrigg, Lancaster, LA1 4YB, UK

<sup>e</sup>Department of Chemistry, Lancaster University, Bailrigg, Lancaster, LA1 4YB, UK

<sup>f</sup>Department of Physics, University of Warwick, CV47AL Coventry, UK

<sup>g</sup>Laboratoire Léon Brillouin, CEA Saclay, Gif-sur-Yvette, France

<sup>h</sup>Synchrotron Soleil, L'Orme les Merisiers, St Aubin, Gif-sur-Yvette, France

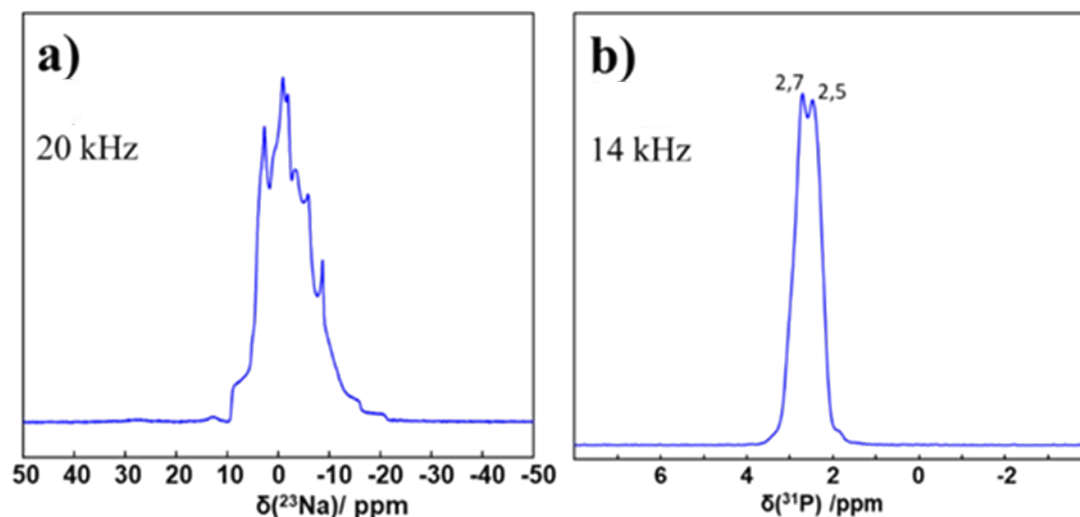

**Figure S1:** <sup>23</sup>Na (a) and <sup>31</sup>P (b) MAS NMR spectra at 14.1 T of the as-synthesized sodium pyrophosphate precursor ( $\text{Na}_4\text{P}_2\text{O}_7$ ) used to prepare  $\alpha$ -canaphite. Both NMR spectra are in agreement with published data for  $\text{Na}_4\text{P}_2\text{O}_7$  (four sites for Na and two sites for P) and confirmed the purity of the sodium and pyrophosphate precursor salt.<sup>1-2</sup>

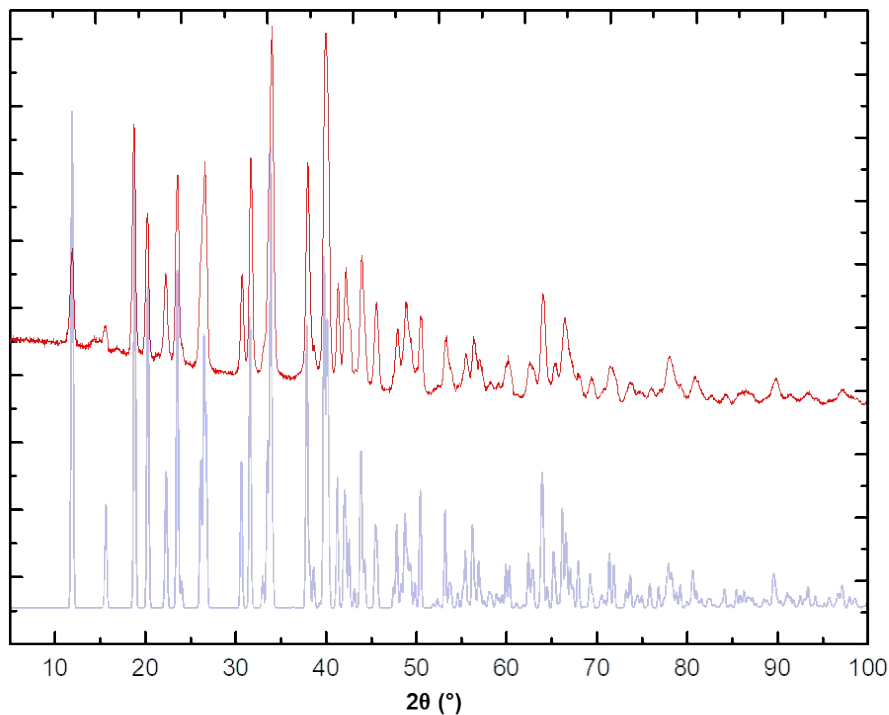

**Figure S2:** X-ray pattern of the as-synthesized  $\alpha$ -canaphite powder obtained with the laboratory X-ray diffractometer ( $\lambda_{\text{Co}(K\alpha)} = 1.788970 \text{ \AA}$ ) (in red) compared to that for a synthetic canaphite monocrystal<sup>8</sup> (ICSD n°26015) (in blue).

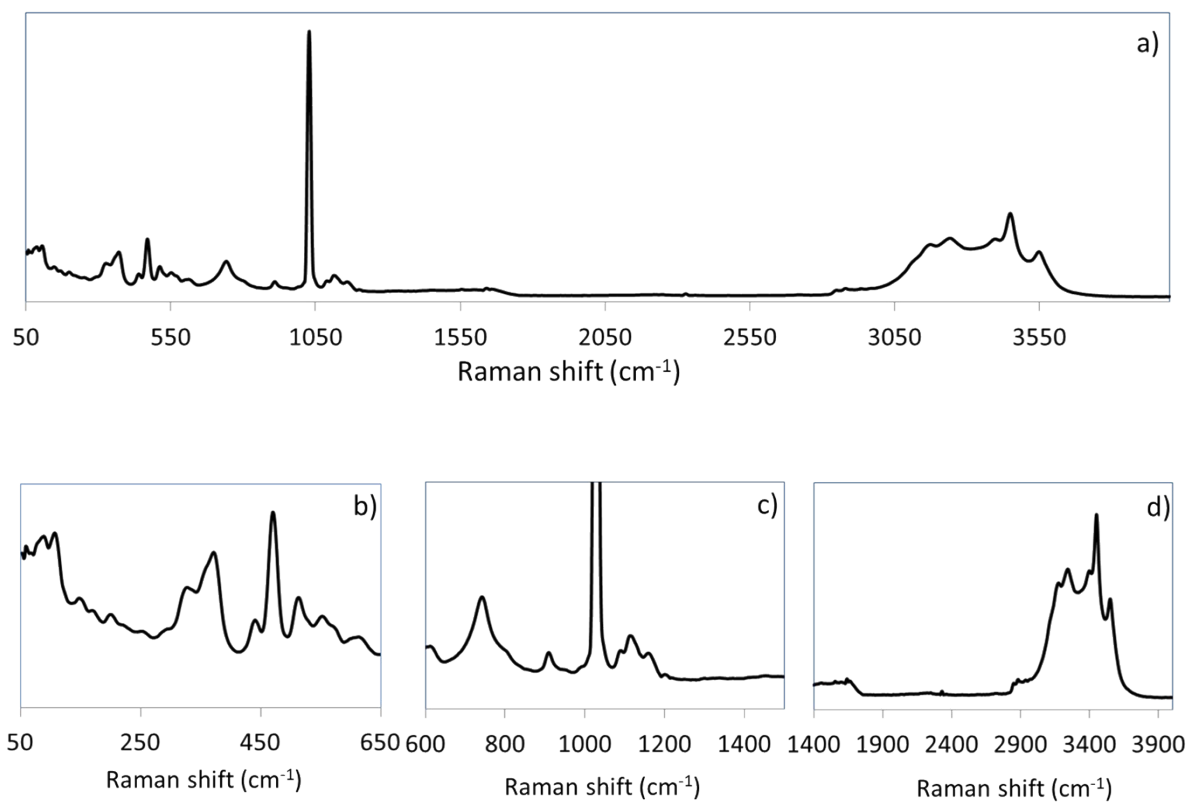

**Figure S3:** Raman spectrum of the  $\alpha$ -canaphite powder synthesized in H<sub>2</sub>O: full spectrum (a) and spectrum divided in three separated domains (b, c and d). The positions and assignments of the lines are reported in Table S4.

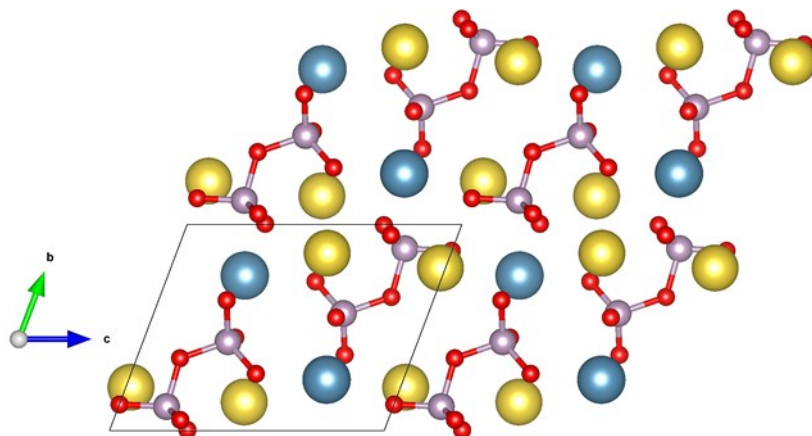

**Figure S4:** Three-dimensional representation of the triclinic elemental cell of the anhydrous calcium disodium pyrophosphate ( $\alpha$ - $\text{CaNa}_2\text{P}_2\text{O}_7$ ). (yellow: sodium, blue: calcium, grey: phosphorus, red: oxygen)

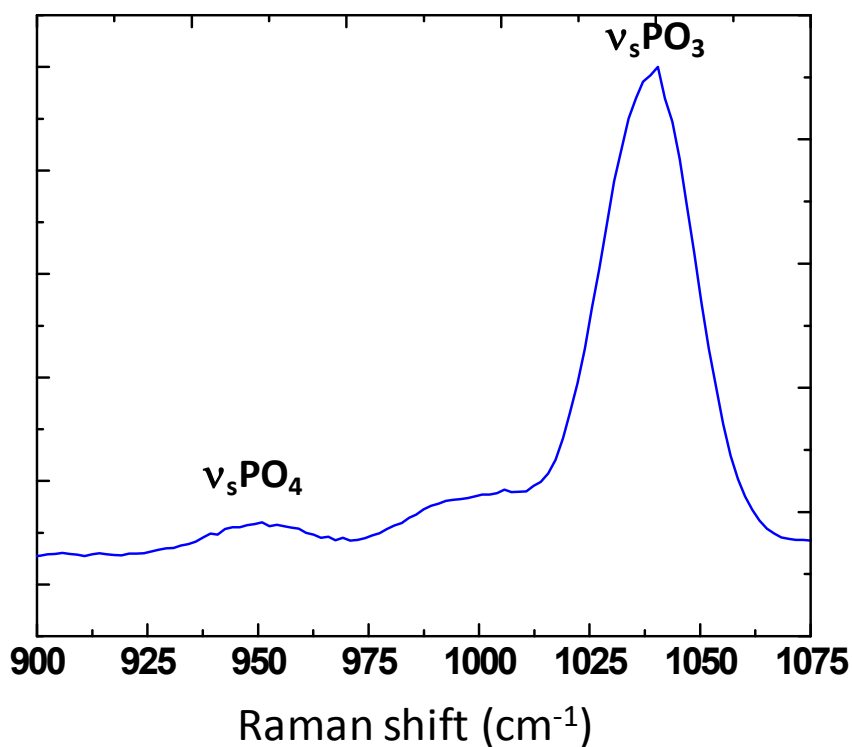

**Figure S5:** Raman spectrum (900-1075  $\text{cm}^{-1}$  domain) of  $\alpha$ -canaphite dried at 250°C showing the presence of a weak characteristic vibration band of the orthophosphate group  $\nu_s\text{PO}_4$  in addition to the strong  $\nu_s\text{PO}_3$  band of pyrophosphate testifying for an internal hydrolysis of part of pyrophosphate ions into orthophosphate ones according to the equation:  $\text{P}_2\text{O}_7^{4-} + \text{H}_2\text{O} \rightarrow 2 \text{HPO}_4^{2-}$ .

**Table S1:** Structural parameters and symmetry of  $\alpha$ -CaNa<sub>2</sub>P<sub>2</sub>O<sub>7</sub> determined by XRD analysis on single crystal<sup>29</sup> compared to the refinement data (Rietveld refinement on laboratory X-ray diffraction data) of the  $\alpha$ -CaNa<sub>2</sub>P<sub>2</sub>O<sub>7</sub> powder obtained after the heat treatment at 400°C during 15 h of the synthesized  $\alpha$ -canaphite.

| $\alpha$ -CaNa <sub>2</sub> P <sub>2</sub> O <sub>7</sub> sample | Symmetry  | Volume (Å <sup>3</sup> ) | a (Å)        | b (Å)        | c (Å)      | $\alpha$ (°) | $\beta$ (°)  | $\gamma$ (°) |
|------------------------------------------------------------------|-----------|--------------------------|--------------|--------------|------------|--------------|--------------|--------------|
| Monocrystal (Bennazha 1999)                                      | Triclinic | 308.5(3)                 | 5.361(3)     | 7.029(3)     | 8.743(4)   | 69.40(2)     | 89.02(3)     | 88.78(4)     |
| As-synthesized powder                                            | Triclinic | 316.852 (68)             | 5.40070 (65) | 7.09929 (88) | 8.8295(11) | 69.4248 (22) | 89.0318 (33) | 88.7703 (22) |

### Supporting Information on Vibrational Spectroscopy:

Considering the crystal structure of  $\alpha$ -canaphite, the factor group is Cs and the primitive unit cell contains two chemical formula units. The complete treatment results in:

- Acoustic mode (corresponding to crystal vibrations):  $2 A' \oplus A''$
- External vibrations:  $22 A' \oplus 23 A''$
- Librations  $15 A' \oplus 15 A''$  ( $3 A' \oplus 3 A''$  for  $P_2O_7^{4-}$  and  $12 A' \oplus 12 A''$  for  $H_2O$ )
- Internal vibrations of  $P_2O_7^{4-}$  ( $21 A' \oplus 21 A''$ ) and  $H_2O$  ( $12 A' \oplus 12 A''$ )

Considering the  $P_2O_7^{4-}$  molecular unit, the correlation table (Table S2) indicates the distribution of the internal vibrations relative to the original free ion vibratory domains. The 42 total internal vibrations both active in infrared and Raman spectroscopies, are associated to doubling of the vibration levels of the initial free ion. The correlation table for water molecules is reported in Table S3. The 24 total internal vibrations correspond to a multiplication by 8 of the vibration levels of the original molecule. It shall be considered that additional lines corresponding to libration movements of water molecules may possibly occur in the  $P_2O_7^{4-}$  vibration range. Lattice vibrations show up at low energies and have not been considered in this MIR analysis.

**Table S2:** Correlation table for  $P_2O_7^{4-}$

| Symmetry of free $P_2O_7^{4-}$ ion<br>$C_{2v}$ | Site symmetry<br>(for each $P_2O_7^{4-}$ ion)<br>$C_1$ | Factor group (2 $P_2O_7^{4-}$ )<br>$C_s$ |
|------------------------------------------------|--------------------------------------------------------|------------------------------------------|
| 7 $A_1$ (IR, Raman)                            | 21 A                                                   | 7 $A' \oplus 7 A''$ (IR, Raman)          |
| 4 $A_2$ (Raman)                                |                                                        | 4 $A' \oplus 4 A''$ (IR, Raman)          |
| 6 $B_1$ (IR, Raman)                            |                                                        | 6 $A' \oplus 6 A''$ (IR, Raman)          |
| 4 $B_2$ (IR, Raman)                            |                                                        | 4 $A' \oplus 4 A''$ (IR, Raman)          |

**Table S3:** Correlation table for  $H_2O$  ( $D_2O$ )

| Symmetry of free molecule<br>$C_{2v}$ | Site symmetry<br>(for each water molecule)<br>$C_1$ | Factor group (8 $H_2O$ )<br>$C_s$ |
|---------------------------------------|-----------------------------------------------------|-----------------------------------|
| 2 $A_1$ (IR, Raman)                   | 3 A                                                 | 8 $A' \oplus 8 A''$ (IR, Raman)   |
| $B_1$ (IR, Raman)                     |                                                     | 4 $A' \oplus 4 A''$ (IR, Raman)   |

For libration modes of water molecules the factor group treatment predicts  $12 A' \oplus 12 A''$  (IR, Raman).

**Table S4:** FTIR and Raman spectral lines of  $\alpha$ -canaphite and its deuterated analogue (corresponding to the Figure 9): position ( $\text{cm}^{-1}$ ), intensity and assignments.

| Assignments                                                               | H <sub>2</sub> O-canaphite      |         | D <sub>2</sub> O-canaphite |         |       |
|---------------------------------------------------------------------------|---------------------------------|---------|----------------------------|---------|-------|
|                                                                           | FTIR                            | Raman   | FTIR                       | Raman   |       |
| v <sub>s</sub> and v <sub>as</sub><br>H <sub>2</sub> O (D <sub>2</sub> O) | 3562 m                          | 3550 m  | 2633 m                     | 2627 m  |       |
|                                                                           | 3501 sh                         |         | 2563 sh                    |         |       |
|                                                                           | 3454 m                          | 3450 m  | 2549 m                     | 2555 m  |       |
|                                                                           | 3392 w                          | 3399 m  | 2521 w                     | 2522 w  |       |
|                                                                           | 3335 vw                         |         | 2431 m                     | 2438 sh |       |
|                                                                           |                                 |         |                            | 2401 sh |       |
|                                                                           | 3241 m                          | 3241 m  | 2378 m                     |         |       |
|                                                                           | 3169 w                          | 3173 w  | 2355 sh                    | 2359 m  |       |
|                                                                           | 3116 sh                         |         | 2337 sh                    |         |       |
|                                                                           |                                 |         |                            |         |       |
| $\delta$ H <sub>2</sub> O (D <sub>2</sub> O)                              | 1658 b m                        | 1650 bw | 1213 sh                    | 1221 b  |       |
|                                                                           |                                 |         |                            |         |       |
| v <sub>s</sub> and v <sub>as</sub> PO <sub>3</sub>                        | 1157 sh                         | 1160 w  |                            | 1160 w  |       |
|                                                                           | 1139 s                          |         | 1137 s                     |         |       |
|                                                                           | 1125 sh                         | 1126 sh | 1124 sh                    | 1128 sh |       |
|                                                                           | 1108 m                          | 1114 w  | 1108 m                     | 1113 w  |       |
|                                                                           | 1090 s                          | 1090 w  | 1089 s                     | 1092 w  |       |
|                                                                           | 1032 sh                         |         |                            |         |       |
|                                                                           | 1027 m                          | 1028 vs | 1028 m                     | 1029 vs |       |
|                                                                           | 991 w                           | 990 vw  | 991 w                      |         |       |
|                                                                           | 938 m                           |         | 934 m                      |         |       |
| $\delta$ P <sub>2</sub> O <sub>7</sub> , external modes                   | v <sub>as</sub> POP             | 909 m   | 908 w                      | 906 w   | 908 w |
|                                                                           | v <sub>L</sub> H <sub>2</sub> O | 797 b w | 800 b sh                   | 791 sh  |       |
|                                                                           | v <sub>s</sub> POP              |         | 743 m                      | 740 w   | 742 m |
|                                                                           | v <sub>L</sub> H <sub>2</sub> O | 706 b m |                            | 705 b w |       |
|                                                                           |                                 | 614 w   | 609 w                      | 617 sh  | 620 w |
|                                                                           |                                 |         |                            | 606 sh  |       |
|                                                                           |                                 | 569 sh  | 569 sh                     | 570 m   | 573 w |
|                                                                           | v <sub>L</sub> H <sub>2</sub> O | 550 m   | 552 w                      |         |       |
|                                                                           |                                 | 510 vw  | 512 w                      | 503 sh  | 527 w |
|                                                                           |                                 | 468 w   | 470 m                      | 472 w   | 470 m |
|                                                                           |                                 | 438 vw  | 440 w                      |         | 427 w |

b: broad, m: medium intensity, sh: shoulder, v: very, s: strong, w: weak,  
v<sub>s</sub> and v<sub>as</sub>: symmetric and antisymmetric stretching, v<sub>L</sub>: water libration line,  $\delta$ : bending

## References

- 1 L. Griffiths, A. Root, R. K. Harris, K. J. Packer and F. R. Tromans, *J. Chem. Soc. Dalton Trans*, 1986, **10**, 2247–2251.
- 2 S. Hayashi and K. Hayamizu, *Chemical Physics*, 1991, **157**, 381–389.
